# Supplementary material for: C–X⋯π halogen and C–H⋯π hydrogen bonding: interactions of CF3X (X = Cl, Br, I or H) with ethene and propene
Source: Royal Society of Chemistry journal article supplement (doi:10.1039/c1cp22771h), 2011-11-17
Supplement: c1cp22771h.pdf [file c1cp22771h.pdf]

## Supporting Information

for:

**C–X... $\pi$  Halogen and C–H... $\pi$  hydrogen bonding: interactions of CF<sub>3</sub>X (X = Cl, Br, I, H) with ethene and propene †**

Dieter Hauchecorne, Nick Nagels, Benjamin J. van der Veken, Wouter A. Herrebout

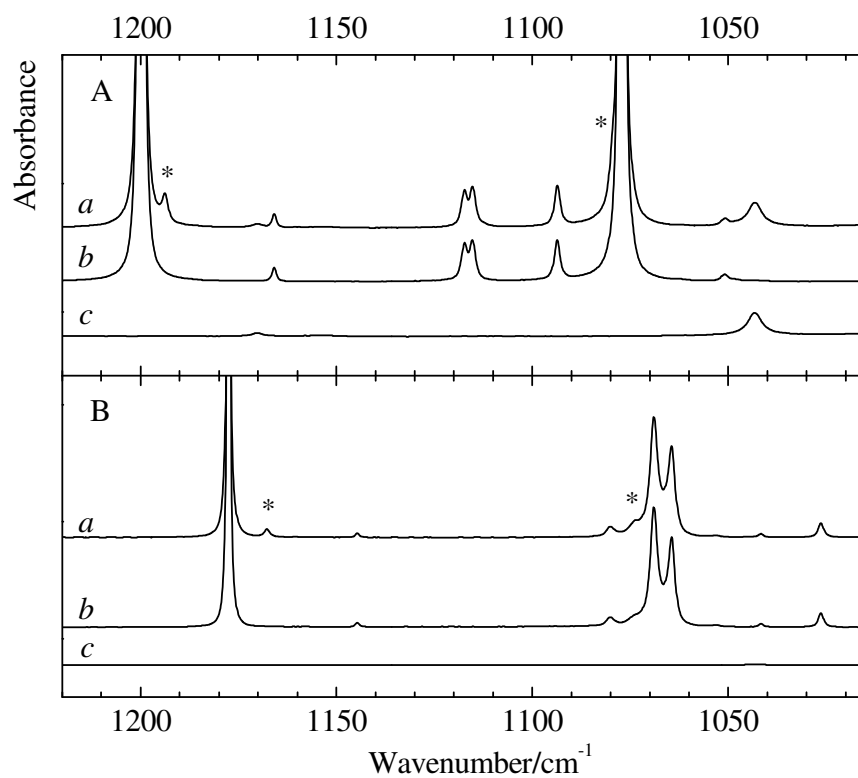

**Fig. S1.** Infrared spectra in the 1220 – 1010 cm<sup>-1</sup> region for solutions in liquid argon of mixtures of CF<sub>3</sub>Br (panel A) or CF<sub>3</sub>I (panel B) with propene. In each panel the spectrum of the mixed solution is give as trace *a*, while those of the solutions containing only propene and CF<sub>3</sub>X are shown as traces *b* and *c*, respectively. New bands appearing in the spectra of the mixture are marked with an asterisk (\*) and are assigned to the 1:1 complex. All spectra were recorded at 93 K

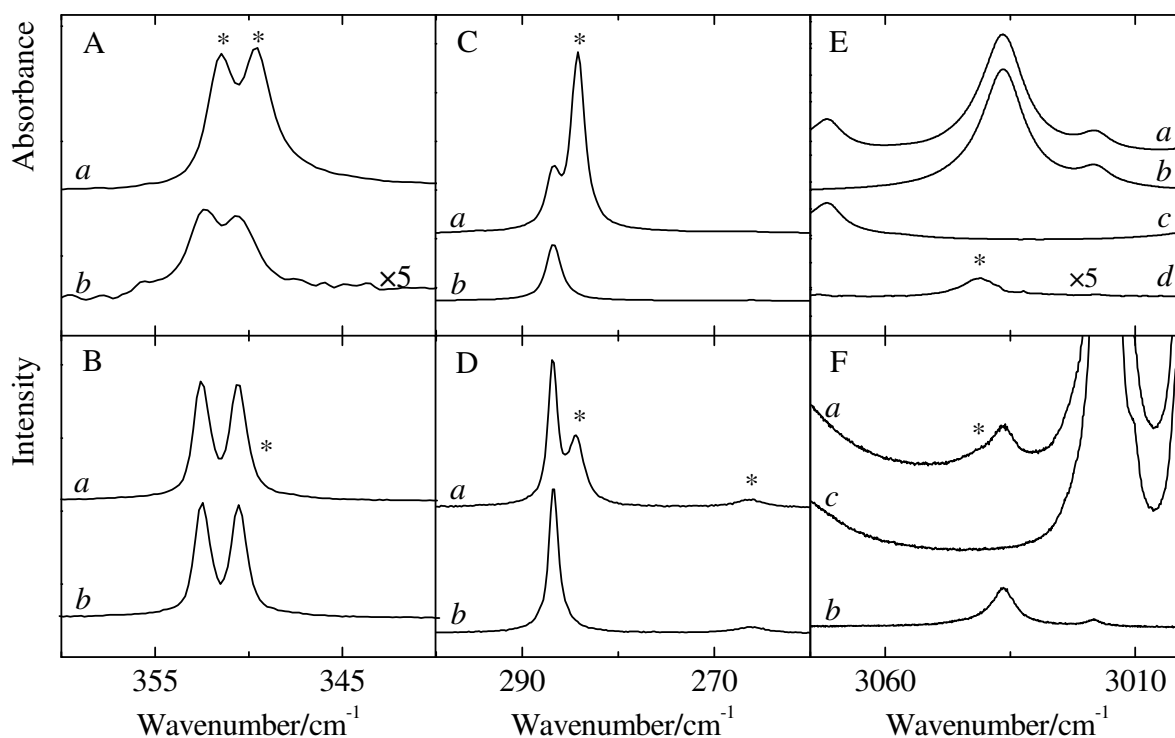

**Fig. S2.** Infrared (panels A, C and E) and Raman (panels B, D and F) spectra of the C–X stretching region for solutions in liquid argon of mixtures of CF<sub>3</sub>Br (panels A and B), CF<sub>3</sub>I (panels C and D) or CF<sub>3</sub>H (panels E and F) with ethene. Trace *a* gives the spectrum of the mixed solution, while traces *b* and *c*, where shown, are the spectra of the monomer CF<sub>3</sub>X and ethene solution, respectively. Trace *d*, where shown, is the spectrum of the 1:1 complex, obtained by subtracting traces *b* and *c* from trace *a*. New bands appearing in the spectra of the mixture are marked with an asterisk (\*) and are assigned to the 1:1 complex. All spectra were recorded at 93 K.

**Table S1.** MP2/aug-cc-pVDZ vibrational frequencies, in  $\text{cm}^{-1}$ , and infrared intensities, in  $\text{km mol}^{-1}$ ,  
for  $\text{CF}_3\text{Cl}\cdot\text{ethene}$ .

| Mode                          | $\nu_{\text{monomer}}$ | IR Intensity | $\nu_{\text{complex}}$ | IR Intensity | $\Delta\nu$ |
|-------------------------------|------------------------|--------------|------------------------|--------------|-------------|
| <b>CF<sub>3</sub>Cl</b>       |                        |              |                        |              |             |
| $\nu_1$ (a <sub>1</sub> )     | 1096.4                 | 496.6        | 1099.4                 | 502.4        | 3.0         |
| $\nu_2$ (a <sub>1</sub> )     | 764.7                  | 24.8         | 762.9                  | 21.8         | -1.8        |
| $\nu_3$ (a <sub>1</sub> )     | 479.9                  | 0.1          | 479.0                  | 1.1          | -1.0        |
| $\nu_4$ (e)                   | 1192.5                 | 564.4        | 1186.5                 | 556.7        | -6.0        |
| $\nu_5$ (e)                   | 545.9                  | 2.8          | 545.9                  | 3.1          | -0.1        |
| $\nu_6$ (e)                   | 347.1                  | 0.004        | 348.6                  | 0.01         | 1.5         |
| <b>Ethene</b>                 |                        |              |                        |              |             |
| $\nu_1$ (a <sub>g</sub> )     | 3198.3                 | 0.0          | 3196.9                 | 0.01         | -1.4        |
| $\nu_2$ (a <sub>g</sub> )     | 1671.2                 | 0.0          | 1667.7                 | 0.2          | -3.5        |
| $\nu_3$ (a <sub>g</sub> )     | 1372.4                 | 0.0          | 1371.3                 | 0.07         | -1.1        |
| $\nu_4$ (a <sub>u</sub> )     | 1048.9                 | 0.0          | 1050.0                 | 0.0          | 1.1         |
| $\nu_5$ (b <sub>1g</sub> )    | 3275.2                 | 0.0          | 3275.3                 | 0.0          | 0.1         |
| $\nu_6$ (b <sub>1g</sub> )    | 1229.7                 | 0.0          | 1229.3                 | 0.0          | -0.3        |
| $\nu_7$ (b <sub>1u</sub> )    | 980.9                  | 95.0         | 984.1                  | 136.0        | 3.2         |
| $\nu_8$ (b <sub>2g</sub> )    | 954.8                  | 0.0          | 956.1                  | 0.01         | 1.3         |
| $\nu_9$ (b <sub>2u</sub> )    | 3303.3                 | 17.1         | 3303.2                 | 12.3         | -0.1        |
| $\nu_{10}$ (b <sub>2u</sub> ) | 820.6                  | 0.0          | 820.6                  | 0.0          | -0.2        |
| $\nu_{11}$ (b <sub>3u</sub> ) | 3180.6                 | 11.2         | 3179.8                 | 8.0          | -0.8        |
| $\nu_{12}$ (b <sub>3u</sub> ) | 1468.3                 | 7.7          | 1467.5                 | 7.7          | -0.7        |

Van der Waals vibrations: 71.1  $\text{cm}^{-1}$ , 0.05  $\text{km mol}^{-1}$ ; 55.7  $\text{cm}^{-1}$ , 0.1  $\text{km mol}^{-1}$ ; 48.2  $\text{cm}^{-1}$ , 0.02  $\text{km mol}^{-1}$ ; 26.0  $\text{cm}^{-1}$ , 0.03  $\text{km mol}^{-1}$ ; 23.9  $\text{cm}^{-1}$ , 0.05  $\text{km mol}^{-1}$ ; 0.6  $\text{cm}^{-1}$ , 0.0  $\text{km mol}^{-1}$ .

**Table S2.** MP2/aug-cc-pVDZ-PP vibrational frequencies, in  $\text{cm}^{-1}$ , and infrared intensities, in  $\text{km mol}^{-1}$ , for  $\text{CF}_3\text{Br}$  ethene.

| Mode                    | $\nu_{\text{monomer}}$ | IR Intensity | $\nu_{\text{complex}}$ | IR Intensity | $\Delta\nu$ |
|-------------------------|------------------------|--------------|------------------------|--------------|-------------|
| <b>CF<sub>3</sub>Br</b> |                        |              |                        |              |             |
| $\nu_1$ ( $a_1$ )       | 1078.3                 | 496.2        | 1081.8                 | 520.9        | 3.6         |
| $\nu_2$ ( $a_1$ )       | 739.5                  | 30.4         | 736.6                  | 26.1         | -2.9        |
| $\nu_3$ ( $a_1$ )       | 360.9                  | 0.03         | 357.8                  | 1.3          | -3.1        |
| $\nu_4$ ( $e$ )         | 1180.2                 | 509.7        | 1172.7                 | 509.3        | -7.5        |
| $\nu_5$ ( $e$ )         | 531.4                  | 1.8          | 530.7                  | 2.1          | -0.7        |
| $\nu_6$ ( $e$ )         | 305.5                  | 0.02         | 306.6                  | 0.01         | 1.1         |
| <b>Ethene</b>           |                        |              |                        |              |             |
| $\nu_1$ ( $a_g$ )       | 3198.3                 | 0.0          | 3196.1                 | 0.01         | -2.1        |
| $\nu_2$ ( $a_g$ )       | 1671.2                 | 0.0          | 1665.4                 | 0.8          | -5.8        |
| $\nu_3$ ( $a_g$ )       | 1372.4                 | 0.0          | 1370.7                 | 0.3          | -1.7        |
| $\nu_4$ ( $a_u$ )       | 1048.9                 | 0.0          | 1050.4                 | 0.0          | 1.5         |
| $\nu_5$ ( $b_{1g}$ )    | 3275.2                 | 0.0          | 3275.4                 | 0.0          | 0.2         |
| $\nu_6$ ( $b_{1g}$ )    | 1229.7                 | 0.0          | 1229.2                 | 0.0          | -0.4        |
| $\nu_7$ ( $b_{1u}$ )    | 980.9                  | 95.0         | 987.1                  | 152.3        | 6.1         |
| $\nu_8$ ( $b_{2g}$ )    | 954.8                  | 0.0          | 958.2                  | 0.0          | 3.4         |
| $\nu_9$ ( $b_{2u}$ )    | 3303.3                 | 17.1         | 3303.1                 | 10.0         | -0.2        |
| $\nu_{10}$ ( $b_{2u}$ ) | 820.6                  | 0.0          | 820.8                  | 03.0         | -0.1        |
| $\nu_{11}$ ( $b_{3u}$ ) | 3180.6                 | 11.2         | 3179.5                 | 6.5          | -1.1        |
| $\nu_{12}$ ( $b_{3u}$ ) | 1468.3                 | 7.7          | 1467.5                 | 7.8          | -0.8        |

Van der Waals vibrations:  $100.4 \text{ cm}^{-1}$ ,  $0.1 \text{ km mol}^{-1}$ ;  $64.8 \text{ cm}^{-1}$ ,  $0.5 \text{ km mol}^{-1}$ ;  $63.5 \text{ cm}^{-1}$ ,  $0.07 \text{ km mol}^{-1}$ ;  $30.4 \text{ cm}^{-1}$ ,  $0.01 \text{ km mol}^{-1}$ ;  $28.6 \text{ cm}^{-1}$ ,  $0.02 \text{ km mol}^{-1}$ ;  $5.8 \text{ cm}^{-1}$ ,  $0.0 \text{ km mol}^{-1}$ .

**Table S3.** MP2/aug-cc-pVDZ-PP vibrational frequencies, in  $\text{cm}^{-1}$ , and infrared intensities, in  $\text{km mol}^{-1}$ , for  $\text{CF}_3\text{I}\cdot\text{ethene}$ .

| Mode                    | $\nu_{\text{monomer}}$ | IR Intensity | $\nu_{\text{complex}}$ | IR Intensity | $\Delta\nu$ |
|-------------------------|------------------------|--------------|------------------------|--------------|-------------|
| <b>CF<sub>3</sub>I</b>  |                        |              |                        |              |             |
| $\nu_1$ ( $a_1$ )       | 1059.6                 | 547.3        | 1066.1                 | 556.8        | 6.5         |
| $\nu_2$ ( $a_1$ )       | 722.3                  | 34.7         | 719.4                  | 27.9         | -2.9        |
| $\nu_3$ ( $a_1$ )       | 294.9                  | 0.3          | 291.0                  | 3.2          | -3.9        |
| $\nu_4$ ( $e$ )         | 1162.6                 | 455.5        | 1153.5                 | 458.8        | -9.1        |
| $\nu_5$ ( $e$ )         | 518.8                  | 1.1          | 517.9                  | 1.4          | -0.9        |
| $\nu_6$ ( $e$ )         | 269.1                  | 0.1          | 269.6                  | 0.003        | 0.6         |
| <b>Ethene</b>           |                        |              |                        |              |             |
| $\nu_1$ ( $a_g$ )       | 3198.3                 | 0.0          | 3195.4                 | 0.03         | -2.9        |
| $\nu_2$ ( $a_g$ )       | 1671.2                 | 0.0          | 1662.8                 | 2.1          | -8.4        |
| $\nu_3$ ( $a_g$ )       | 1372.4                 | 0.0          | 1370.0                 | 0.8          | -2.4        |
| $\nu_4$ ( $a_u$ )       | 1048.9                 | 0.0          | 1050.6                 | 0.0          | 1.7         |
| $\nu_5$ ( $b_{1g}$ )    | 3275.2                 | 0.0          | 3276.6                 | 0.0          | 1.4         |
| $\nu_6$ ( $b_{1g}$ )    | 1229.7                 | 0.0          | 1229.1                 | 0.0          | -0.5        |
| $\nu_7$ ( $b_{1u}$ )    | 980.9                  | 95.0         | 990.4                  | 177.9        | 9.4         |
| $\nu_8$ ( $b_{2g}$ )    | 954.8                  | 0.0          | 960.4                  | 0.0          | 5.5         |
| $\nu_9$ ( $b_{2u}$ )    | 3303.3                 | 17.1         | 3303.1                 | 7.5          | -0.2        |
| $\nu_{10}$ ( $b_{2u}$ ) | 820.6                  | 0.0          | 820.9                  | 0.0          | 0.1         |
| $\nu_{11}$ ( $b_{3u}$ ) | 3180.6                 | 11.2         | 3179.2                 | 4.8          | -1.4        |
| $\nu_{12}$ ( $b_{3u}$ ) | 1468.3                 | 7.7          | 1467.4                 | 7.9          | -0.9        |

Van der Waals vibrations:  $129.0 \text{ cm}^{-1}$ ,  $0.2 \text{ km mol}^{-1}$ ;  $77.9 \text{ cm}^{-1}$ ,  $0.1 \text{ km mol}^{-1}$ ;  $70.6 \text{ cm}^{-1}$ ,  $1.6 \text{ km mol}^{-1}$ ;  $33.2 \text{ cm}^{-1}$ ,  $0.01 \text{ km mol}^{-1}$ ;  $31.8 \text{ cm}^{-1}$ ,  $0.02 \text{ km mol}^{-1}$ ;  $1.1 \text{ cm}^{-1}$ ,  $0.0 \text{ km mol}^{-1}$ .

**Table S4.** MP2/aug-cc-pVDZ vibrational frequencies, in  $\text{cm}^{-1}$ , and infrared intensities, in  $\text{km mol}^{-1}$ ,  
 for  $\text{CF}_3\text{H}\cdot\text{ethene}$ .

| Mode                          | $\nu_{\text{monomer}}$ | IR Intensity | $\nu_{\text{complex}}$ | IR Intensity | $\Delta\nu$ |
|-------------------------------|------------------------|--------------|------------------------|--------------|-------------|
| <b>CF<sub>3</sub>H</b>        |                        |              |                        |              |             |
| $\nu_1$ (a <sub>1</sub> )     | 3226.1                 | 20.7         | 3239.5                 | 12.8         | 13.4        |
| $\nu_2$ (a <sub>1</sub> )     | 1121.2                 | 94.0         | 1117.3                 | 99.9         | -3.9        |
| $\nu_3$ (a <sub>1</sub> )     | 677.5                  | 12.7         | 676.0                  | 14.0         | -1.6        |
| $\nu_4$ (e)                   | 1382.5                 | 80.2         | 1383.9                 | 63.2         | 1.4         |
| $\nu_5$ (e)                   | 1144.0                 | 597.9        | 1138.4                 | 560.2        | -5.5        |
| $\nu_6$ (e)                   | 490.7                  | 4.6          | 490.6                  | 4.6          | -0.1        |
| <b>Ethene</b>                 |                        |              |                        |              |             |
| $\nu_1$ (a <sub>g</sub> )     | 3198.3                 | 0.0          | 3195.8                 | 0.08         | -2.5        |
| $\nu_2$ (a <sub>g</sub> )     | 1671.2                 | 0.0          | 1667.7                 | 0.03         | -3.5        |
| $\nu_3$ (a <sub>g</sub> )     | 1372.4                 | 0.0          | 1372.2                 | 0.02         | -0.2        |
| $\nu_4$ (a <sub>u</sub> )     | 1048.9                 | 0.0          | 1053.8                 | 1.3          | 4.9         |
| $\nu_5$ (b <sub>1g</sub> )    | 3275.2                 | 0.0          | 3274.9                 | 0.2          | -0.3        |
| $\nu_6$ (b <sub>1g</sub> )    | 1229.7                 | 0.0          | 1230.9                 | 0.05         | 1.2         |
| $\nu_7$ (b <sub>1u</sub> )    | 980.9                  | 95.0         | 989.6                  | 111.8        | 8.7         |
| $\nu_8$ (b <sub>2g</sub> )    | 954.8                  | 0.0          | 961.1                  | 0.1          | 6.3         |
| $\nu_9$ (b <sub>2u</sub> )    | 3303.3                 | 17.1         | 3302.5                 | 12.1         | -0.8        |
| $\nu_{10}$ (b <sub>2u</sub> ) | 820.6                  | 0.0          | 822.2                  | 0.0          | 1.4         |
| $\nu_{11}$ (b <sub>3u</sub> ) | 3180.6                 | 11.2         | 3179.1                 | 7.1          | -1.5        |
| $\nu_{12}$ (b <sub>3u</sub> ) | 1468.3                 | 7.7          | 1469.1                 | 7.8          | 0.8         |

Van der Waals vibrations: 93.5  $\text{cm}^{-1}$ , 0.03  $\text{km mol}^{-1}$ ; 66.8  $\text{cm}^{-1}$ , 0.6  $\text{km mol}^{-1}$ ; 60.9  $\text{cm}^{-1}$ , 0.0  $\text{km mol}^{-1}$ ; 36.3  $\text{cm}^{-1}$ , 0.9  $\text{km mol}^{-1}$ ; 32.8  $\text{cm}^{-1}$ , 2.4  $\text{km mol}^{-1}$ ; 3.8  $\text{cm}^{-1}$ , 0.02  $\text{km mol}^{-1}$ .

**Table S5.** MP2/aug-cc-pVDZ vibrational frequencies, in  $\text{cm}^{-1}$ , and infrared intensities, in  $\text{km mol}^{-1}$ ,  
 for  $\text{CF}_3\text{Cl}\cdot\text{propene}$ .

| Mode                      | $\nu_{\text{monomer}}$ | IR Intensity | $\nu_{\text{complex}}$ | IR Intensity | $\Delta\nu$ |
|---------------------------|------------------------|--------------|------------------------|--------------|-------------|
| <b>CF<sub>3</sub>Cl</b>   |                        |              |                        |              |             |
| $\nu_1$ (a <sub>1</sub> ) | 1096.4                 | 496.6        | 1098.9                 | 520.6        | 2.5         |
| $\nu_2$ (a <sub>1</sub> ) | 764.7                  | 24.8         | 762.5                  | 21.7         | -2.2        |
| $\nu_3$ (a <sub>1</sub> ) | 479.9                  | 0.1          | 478.7                  | 1.3          | -1.2        |
| $\nu_4$ (e)               | 1192.5                 | 564.4        | 1186.1                 | 545.4        | -6.5        |
| $\nu_5$ (e)               | 545.9                  | 2.8          | 545.8                  | 3.0          | -0.1        |
| $\nu_6$ (e)               | 347.1                  | 0.004        | 348.8                  | 0.01         | 1.7         |
| <b>Propene</b>            |                        |              |                        |              |             |
| $\nu_1$ (a')              | 3283.3                 | 13.9         | 3282.3                 | 10.7         | -1.0        |
| $\nu_2$ (a')              | 3193.8                 | 13.7         | 3192.8                 | 11.8         | -1.1        |
| $\nu_3$ (a')              | 3177.3                 | 13.0         | 3175.7                 | 9.5          | -1.7        |
| $\nu_4$ (a')              | 3161.1                 | 9.4          | 3160.9                 | 8.1          | -0.2        |
| $\nu_5$ (a')              | 3059.4                 | 21.2         | 3058.7                 | 17.2         | -0.7        |
| $\nu_6$ (a')              | 1696.3                 | 10.7         | 1692.0                 | 8.9          | -4.3        |
| $\nu_7$ (a')              | 1486.3                 | 13.2         | 1485.4                 | 15.4         | -0.9        |
| $\nu_8$ (a')              | 1446.8                 | 0.8          | 1446.0                 | 1.2          | -0.9        |
| $\nu_9$ (a')              | 1389.0                 | 1.5          | 1389.2                 | 2.0          | 0.2         |
| $\nu_{10}$ (a')           | 1316.8                 | 0.1          | 1316.1                 | 0.1          | -0.7        |
| $\nu_{11}$ (a')           | 1188.3                 | 0.2          | 1188.4                 | 1.8          | 0.1         |
| $\nu_{12}$ (a')           | 941.4                  | 2.8          | 940.8                  | 3.9          | -0.6        |
| $\nu_{13}$ (a')           | 934.4                  | 2.4          | 934.1                  | 20.7         | -0.3        |
| $\nu_{14}$ (a')           | 419.1                  | 0.9          | 419.2                  | 0.7          | 0.0         |
| $\nu_{15}$ (a'')          | 3139.6                 | 14.7         | 3139.4                 | 16.6         | -0.2        |
| $\nu_{16}$ (a'')          | 1469.0                 | 6.3          | 1467.6                 | 7.4          | -1.4        |
| $\nu_{17}$ (a'')          | 1056.4                 | 4.4          | 1056.3                 | 3.7          | -0.1        |
| $\nu_{18}$ (a'')          | 1011.3                 | 16.5         | 1013.1                 | 28.1         | 1.8         |
| $\nu_{19}$ (a'')          | 932.1                  | 38.8         | 934.8                  | 33.4         | 2.6         |
| $\nu_{20}$ (a'')          | 582.4                  | 11.8         | 586.1                  | 14.0         | 3.6         |
| $\nu_{21}$ (a'')          | 204.8                  | 0.5          | 209.8                  | 0.8          | 5.0         |

Van der Waals vibrations: 65.0  $\text{cm}^{-1}$ , 0.4  $\text{km mol}^{-1}$ ; 58.8  $\text{cm}^{-1}$ , 0.02  $\text{km mol}^{-1}$ ; 52.3  $\text{cm}^{-1}$ , 0.04  $\text{km mol}^{-1}$ ; 28.8  $\text{cm}^{-1}$ , 0.06  $\text{km mol}^{-1}$ ; 23.8  $\text{cm}^{-1}$ , 0.09  $\text{km mol}^{-1}$ ; 4.3  $\text{cm}^{-1}$ , 0.02  $\text{km mol}^{-1}$ .



**Table S6.** MP2/aug-cc-pVDZ-PP vibrational frequencies, in  $\text{cm}^{-1}$ , and infrared intensities, in  $\text{km mol}^{-1}$ , for  $\text{CF}_3\text{Br}\cdot\text{propene}$ .

| Mode                      | $\nu_{\text{monomer}}$ | IR Intensity | $\nu_{\text{complex}}$ | IR Intensity | $\Delta\nu$ |
|---------------------------|------------------------|--------------|------------------------|--------------|-------------|
| <b>CF<sub>3</sub>Br</b>   |                        |              |                        |              |             |
| $\nu_1$ (a <sub>1</sub> ) | 1078.3                 | 496.2        | 1081.7                 | 541.2        | 3.4         |
| $\nu_2$ (a <sub>1</sub> ) | 739.5                  | 30.4         | 736.1                  | 25.5         | -3.4        |
| $\nu_3$ (a <sub>1</sub> ) | 360.9                  | 0.03         | 356.9                  | 1.7          | -4.0        |
| $\nu_4$ (e)               | 1180.2                 | 509.7        | 1171.8                 | 502.4        | -8.3        |
| $\nu_5$ (e)               | 531.4                  | 1.8          | 530.5                  | 2.1          | -0.9        |
| $\nu_6$ (e)               | 305.5                  | 0.02         | 306.6                  | 0.01         | 1.1         |
| <b>Propene</b>            |                        |              |                        |              |             |
| $\nu_1$ (a')              | 3283.3                 | 13.9         | 3282.1                 | 8.7          | -1.2        |
| $\nu_2$ (a')              | 3193.8                 | 13.7         | 3192.4                 | 10.9         | -1.4        |
| $\nu_3$ (a')              | 3177.3                 | 13.0         | 3175.2                 | 7.9          | -2.1        |
| $\nu_4$ (a')              | 3161.1                 | 9.4          | 3161.8                 | 7.4          | 0.7         |
| $\nu_5$ (a')              | 3059.4                 | 21.2         | 3059.2                 | 15.7         | -0.2        |
| $\nu_6$ (a')              | 1696.3                 | 10.7         | 1688.9                 | 10.0         | -7.3        |
| $\nu_7$ (a')              | 1486.3                 | 13.2         | 1485.2                 | 15.6         | -1.1        |
| $\nu_8$ (a')              | 1446.8                 | 0.8          | 1445.7                 | 1.6          | -1.2        |
| $\nu_9$ (a')              | 1389.0                 | 1.5          | 1389.3                 | 2.4          | 0.3         |
| $\nu_{10}$ (a')           | 1316.8                 | 0.1          | 1315.8                 | 0.2          | -1.0        |
| $\nu_{11}$ (a')           | 1188.3                 | 0.2          | 1188.7                 | 0.05         | 0.4         |
| $\nu_{12}$ (a')           | 941.4                  | 2.8          | 940.6                  | 10.0         | -0.7        |
| $\nu_{13}$ (a')           | 934.4                  | 2.4          | 934.4                  | 5.2          | 0.0         |
| $\nu_{14}$ (a')           | 419.1                  | 0.9          | 418.9                  | 0.7          | -0.2        |
| $\nu_{15}$ (a'')          | 3139.6                 | 14.7         | 3140.3                 | 15.3         | 0.6         |
| $\nu_{16}$ (a'')          | 1469.0                 | 6.3          | 1467.4                 | 7.4          | -1.6        |
| $\nu_{17}$ (a'')          | 1056.4                 | 4.4          | 1056.5                 | 6.3          | 0.1         |
| $\nu_{18}$ (a'')          | 1011.3                 | 16.5         | 1014.0                 | 32.4         | 2.7         |
| $\nu_{19}$ (a'')          | 932.1                  | 38.8         | 936.6                  | 49.9         | 4.5         |
| $\nu_{20}$ (a'')          | 582.4                  | 11.8         | 589.2                  | 15.9         | 6.8         |
| $\nu_{21}$ (a'')          | 204.8                  | 0.5          | 209.9                  | 0.9          | 5.1         |

Van der Waals vibrations:  $74.5 \text{ cm}^{-1}$ ,  $1.2 \text{ km mol}^{-1}$ ;  $70.9 \text{ cm}^{-1}$ ,  $0.06 \text{ km mol}^{-1}$ ;  $55.5 \text{ cm}^{-1}$ ,  $0.04 \text{ km mol}^{-1}$ ;  $32.9 \text{ cm}^{-1}$ ,  $0.04 \text{ km mol}^{-1}$ ;  $26.9 \text{ cm}^{-1}$ ,  $0.08 \text{ km mol}^{-1}$ ;  $3.4 \text{ cm}^{-1}$ ,  $0.02 \text{ km mol}^{-1}$ .

**Table S7.** MP2/aug-cc-pVDZ-PP vibrational frequencies, in  $\text{cm}^{-1}$ , and infrared intensities, in  $\text{km mol}^{-1}$ , for  $\text{CF}_3\text{I}$ •propene.

| Mode                      | $\nu_{\text{monomer}}$ | IR Intensity | $\nu_{\text{complex}}$ | IR Intensity | $\Delta\nu$ |
|---------------------------|------------------------|--------------|------------------------|--------------|-------------|
| <b>CF<sub>3</sub>I</b>    |                        |              |                        |              |             |
| $\nu_1$ (a <sub>1</sub> ) | 1059.6                 | 547.3        | 1066.3                 | 571.1        | 6.7         |
| $\nu_2$ (a <sub>1</sub> ) | 722.3                  | 34.7         | 718.7                  | 26.6         | -3.6        |
| $\nu_3$ (a <sub>1</sub> ) | 294.9                  | 0.3          | 289.7                  | 4.1          | -5.2        |
| $\nu_4$ (e)               | 1162.6                 | 455.5        | 1152.0                 | 453.9        | -10.6       |
| $\nu_5$ (e)               | 518.8                  | 1.1          | 517.6                  | 1.3          | -1.2        |
| $\nu_6$ (e)               | 269.1                  | 0.1          | 269.4                  | 0.006        | 0.3         |
| <b>Propene</b>            |                        |              |                        |              |             |
| $\nu_1$ (a')              | 3283.3                 | 13.9         | 3281.9                 | 6.6          | -1.5        |
| $\nu_2$ (a')              | 3193.8                 | 13.7         | 3192.1                 | 9.8          | -1.7        |
| $\nu_3$ (a')              | 3177.3                 | 13.0         | 3174.7                 | 6.1          | -2.7        |
| $\nu_4$ (a')              | 3161.1                 | 9.4          | 3162.8                 | 6.7          | 1.7         |
| $\nu_5$ (a')              | 3059.4                 | 21.2         | 3059.7                 | 13.8         | 0.3         |
| $\nu_6$ (a')              | 1696.3                 | 10.7         | 1685.1                 | 13.1         | -11.2       |
| $\nu_7$ (a')              | 1486.3                 | 13.2         | 1484.9                 | 16.4         | -1.4        |
| $\nu_8$ (a')              | 1446.8                 | 0.8          | 1445.2                 | 2.2          | -1.7        |
| $\nu_9$ (a')              | 1389.0                 | 1.5          | 1389.4                 | 2.9          | 0.4         |
| $\nu_{10}$ (a')           | 1316.8                 | 0.1          | 1315.5                 | 0.3          | -1.3        |
| $\nu_{11}$ (a')           | 1188.3                 | 0.2          | 1189.2                 | 0.05         | 0.9         |
| $\nu_{12}$ (a')           | 941.4                  | 2.8          | 937.9                  | 28.1         | -3.4        |
| $\nu_{13}$ (a')           | 934.4                  | 2.4          | 934.6                  | 4.3          | 0.2         |
| $\nu_{14}$ (a')           | 419.1                  | 0.9          | 418.7                  | 0.7          | -0.4        |
| $\nu_{15}$ (a'')          | 3139.6                 | 14.7         | 3141.2                 | 14.1         | 1.5         |
| $\nu_{16}$ (a'')          | 1469.0                 | 6.3          | 1466.9                 | 7.8          | -2.1        |
| $\nu_{17}$ (a'')          | 1056.4                 | 4.4          | 1056.3                 | 20.6         | -0.1        |
| $\nu_{18}$ (a'')          | 1011.3                 | 16.5         | 1015.0                 | 39.2         | 3.7         |
| $\nu_{19}$ (a'')          | 932.1                  | 38.8         | 941.8                  | 43.3         | 9.7         |
| $\nu_{20}$ (a'')          | 582.4                  | 11.8         | 593.6                  | 18.3         | 11.2        |
| $\nu_{21}$ (a'')          | 204.8                  | 0.5          | 211.5                  | 1.0          | 6.7         |

Van der Waals vibrations: 87.5  $\text{cm}^{-1}$ , 0.1  $\text{km mol}^{-1}$ ; 84.6  $\text{cm}^{-1}$ , 3.1  $\text{km mol}^{-1}$ ; 59.6  $\text{cm}^{-1}$ , 0.3  $\text{km mol}^{-1}$ ; 35.9  $\text{cm}^{-1}$ , 0.0  $\text{km mol}^{-1}$ ; 29.6  $\text{cm}^{-1}$ , 0.07  $\text{km mol}^{-1}$ ; 2.3  $\text{cm}^{-1}$ , 0.01  $\text{km mol}^{-1}$ .

**Table S8.** MP2/aug-cc-pVDZ vibrational frequencies, in  $\text{cm}^{-1}$ , and infrared intensities, in  $\text{km mol}^{-1}$ , for  $\text{CF}_3\text{H}\cdot\text{propene}$ .

| Mode                      | $\nu_{\text{monomer}}$ | IR Intensity | $\nu_{\text{complex}}$ | IR Intensity | $\Delta\nu$ |
|---------------------------|------------------------|--------------|------------------------|--------------|-------------|
| <b>CF<sub>3</sub>H</b>    |                        |              |                        |              |             |
| $\nu_1$ (a <sub>1</sub> ) | 3226.1                 | 20.7         | 3236.8                 | 8.5          | 10.7        |
| $\nu_2$ (a <sub>1</sub> ) | 1121.2                 | 94.0         | 1115.6                 | 98.5         | -5.6        |
| $\nu_3$ (a <sub>1</sub> ) | 677.5                  | 12.7         | 675.5                  | 13.8         | -2.1        |
| $\nu_4$ (e)               | 1382.5                 | 80.2         | 1384.9                 | 38.7         | 2.4         |
| $\nu_5$ (e)               | 1144.0                 | 597.9        | 1136.3                 | 567.7        | -7.6        |
| $\nu_6$ (e)               | 490.7                  | 4.6          | 490.2                  | 4.8          | -0.5        |
| <b>Propene</b>            |                        |              |                        |              |             |
| $\nu_1$ (a')              | 3283.3                 | 13.9         | 3279.9                 | 10.8         | -3.4        |
| $\nu_2$ (a')              | 3193.8                 | 13.7         | 3192.2                 | 12.7         | -1.6        |
| $\nu_3$ (a')              | 3177.3                 | 13.0         | 3173.6                 | 9.6          | -3.8        |
| $\nu_4$ (a')              | 3161.1                 | 9.4          | 3164.3                 | 5.1          | 3.2         |
| $\nu_5$ (a')              | 3059.4                 | 21.2         | 3061.8                 | 14.3         | 2.4         |
| $\nu_6$ (a')              | 1696.3                 | 10.7         | 1691.3                 | 10.3         | -5.0        |
| $\nu_7$ (a')              | 1486.3                 | 13.2         | 1486.9                 | 14.3         | 0.5         |
| $\nu_8$ (a')              | 1446.8                 | 0.8          | 1446.1                 | 1.0          | -0.8        |
| $\nu_9$ (a')              | 1389.0                 | 1.5          | 1392.4                 | 24.8         | 3.4         |
| $\nu_{10}$ (a')           | 1316.8                 | 0.1          | 1316.6                 | 0.1          | -0.2        |
| $\nu_{11}$ (a')           | 1188.3                 | 0.2          | 1189.6                 | 0.8          | 1.3         |
| $\nu_{12}$ (a')           | 941.4                  | 2.8          | 940.5                  | 4.9          | -0.9        |
| $\nu_{13}$ (a')           | 934.4                  | 2.4          | 934.7                  | 22.8         | 0.4         |
| $\nu_{14}$ (a')           | 419.1                  | 0.9          | 418.9                  | 0.7          | -0.2        |
| $\nu_{15}$ (a'')          | 3139.6                 | 14.7         | 3143.2                 | 11.9         | 3.6         |
| $\nu_{16}$ (a'')          | 1469.0                 | 6.3          | 1467.7                 | 7.2          | -1.3        |
| $\nu_{17}$ (a'')          | 1056.4                 | 4.4          | 1058.4                 | 3.5          | 2.0         |
| $\nu_{18}$ (a'')          | 1011.3                 | 16.5         | 1017.3                 | 20.6         | 6.0         |
| $\nu_{19}$ (a'')          | 932.1                  | 38.8         | 935.4                  | 22.2         | 3.3         |
| $\nu_{20}$ (a'')          | 582.4                  | 11.8         | 589.6                  | 13.1         | 7.2         |
| $\nu_{21}$ (a'')          | 204.8                  | 0.5          | 213.6                  | 0.7          | 8.8         |

Van der Waals vibrations: 71.2  $\text{cm}^{-1}$ , 1.1  $\text{km mol}^{-1}$ ; 62.7  $\text{cm}^{-1}$ , 0.3  $\text{km mol}^{-1}$ ; 59.9  $\text{cm}^{-1}$ , 0.08  $\text{km mol}^{-1}$ ; 29.1  $\text{cm}^{-1}$ , 0.1  $\text{km mol}^{-1}$ ; 17.9  $\text{cm}^{-1}$ , 1.9  $\text{km mol}^{-1}$ ; 8.2  $\text{cm}^{-1}$ , 1.3  $\text{km mol}^{-1}$ .

**Table S9.** MP2/aug-cc-pVDZ(-PP) complexation enthalpies, in vapour phase (vap) and corresponding liquid argon (LAr)<sup>a</sup>, and experimental complexation enthalpies for the complexes of CF<sub>3</sub>Cl, CF<sub>3</sub>Br and CF<sub>3</sub>I with ethene and propene. All data are in kJ mol<sup>-1</sup>.

|                                     | Ethene             |                    |                   | Propene            |                    |                   |
|-------------------------------------|--------------------|--------------------|-------------------|--------------------|--------------------|-------------------|
|                                     | CF <sub>3</sub> Cl | CF <sub>3</sub> Br | CF <sub>3</sub> I | CF <sub>3</sub> Cl | CF <sub>3</sub> Br | CF <sub>3</sub> I |
| $\Delta H^\circ(\text{vap,calc})$   | -5.6               | -8.8               | -11.4             | -8.1               | -11.6              | -15.0             |
| $\Delta H^\circ(\text{LAr,calc})^b$ | -0.6(4)            | -3.1(4)            | -5.0(4)           | -2.5(5)            | -5.6(5)            | -8.5(5)           |
| Experimental                        |                    |                    |                   |                    |                    |                   |
| $\Delta H^\circ(\text{LAr})^b$      |                    | -5.3(2)            | -7.5(2)           |                    | -5.6(1)            | -8.8(1)           |

<sup>a</sup> The temperature at which the transformation was calculated is 113 K.

<sup>b</sup> Uncertainties are 2 $\sigma$ .
